# Supplementary material
Source: Springer Nature journal article supplement (https://www.springermedizin.de/resource/supplementary/12891_2008_522_MOESM1_ESM.pdf/9511226)
Supplement: MOESM1 [file 9511226]

Radiographic  
knee 'OA'

'Whole  
joint  
complex'  
OA

Non 'OA'  
Pathology  
e.g.  
tendonitis

Systemic  
disease e.g.  
cancer &  
referred pain

Non-  
physical e.g.  
depression
